# Supplementary material
Source: MDPI journal article supplement (https://www.mdpi.com/2504-3110/8/5/294)
Supplement: s1 [file s1]

Archive with 1 entries (1 files):
- fractalfract-2976973-supplementary.pdf
